# Supplementary material for: Metallic mesoporous oxide single crystals delivering enhanced electrocatalytic performance
Source: Royal Society of Chemistry journal article supplement (doi:10.1039/d4cy01219d), 2024-12-20
Supplement: d4cy01219d1.pdf [file d4cy01219d1.pdf]

## Supporting Information

### Metallic mesoporous oxide single crystals delivering enhanced electrocatalytic performance

Menghui Han,<sup>abcd</sup> Fangyuan Cheng<sup>\*abcd</sup> and Kui Xie<sup>\*abcde</sup>

<sup>a</sup> College of Chemistry and Materials Science, Fujian Normal University, Fuzhou 350117, China.

<sup>b</sup> Key Laboratory of Design & Assembly of Functional Nanostructures, Fujian Institute of Research on the Structure of Matter, Chinese Academy of Sciences, Fuzhou, Fujian 350002, China.

<sup>c</sup> Fujian Science & Technology Innovation Laboratory for Optoelectronic Information of China, Fuzhou, Fujian 350108, China.

<sup>d</sup> Fujian College, University of Chinese Academy of Sciences, Fuzhou 350108, China.

<sup>e</sup> School of Mechanical Engineering, Shanghai Jiao Tong University, 800 Dongchuan Road, Shanghai, 200240, China.

\* Corresponding author: cfy@fjirsm.ac.cn (F. Cheng), xiekui@sjtu.edu.cn (K. Xie).

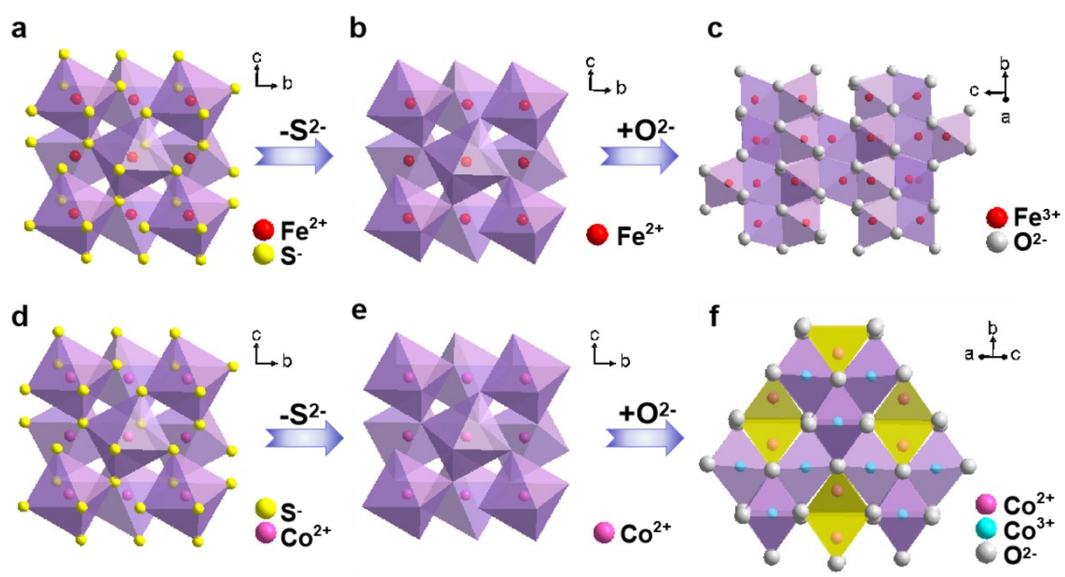

**Fig. S1** Growth mechanism of PSC  $\text{Fe}_2\text{O}_3$  and PSC  $\text{Co}_3\text{O}_4$ .

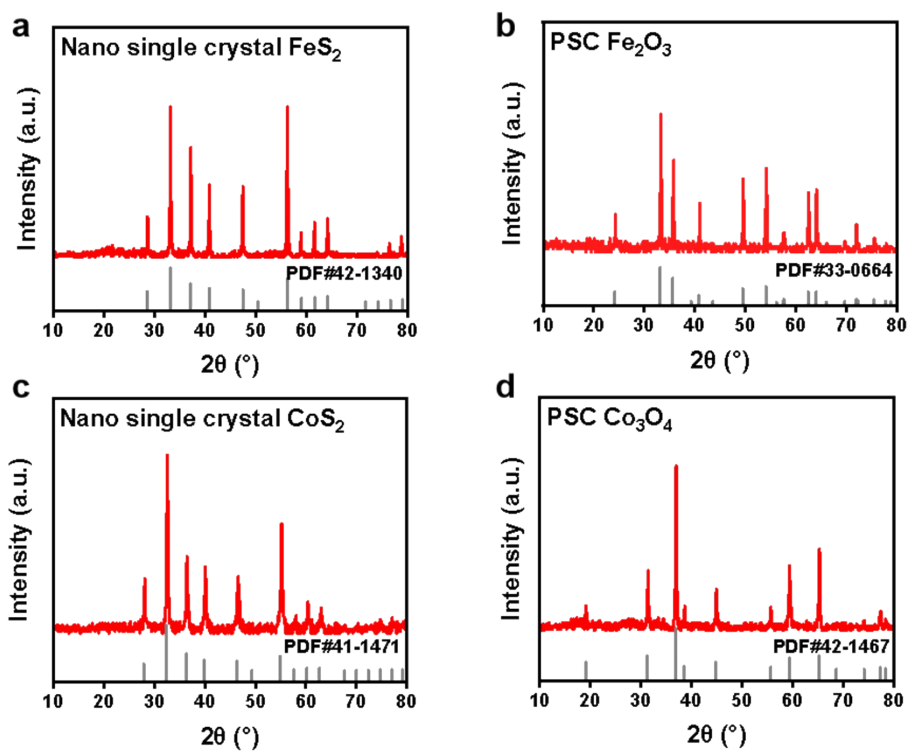

**Fig. S2** XRD patterns of different nano single crystals compared with standard cards. (a)  $\text{FeS}_2$  nano single crystal. (b) PSC  $\text{Fe}_2\text{O}_3$ . (c)  $\text{CoS}_2$  nano single crystal. (d) PSC  $\text{Co}_3\text{O}_4$ .

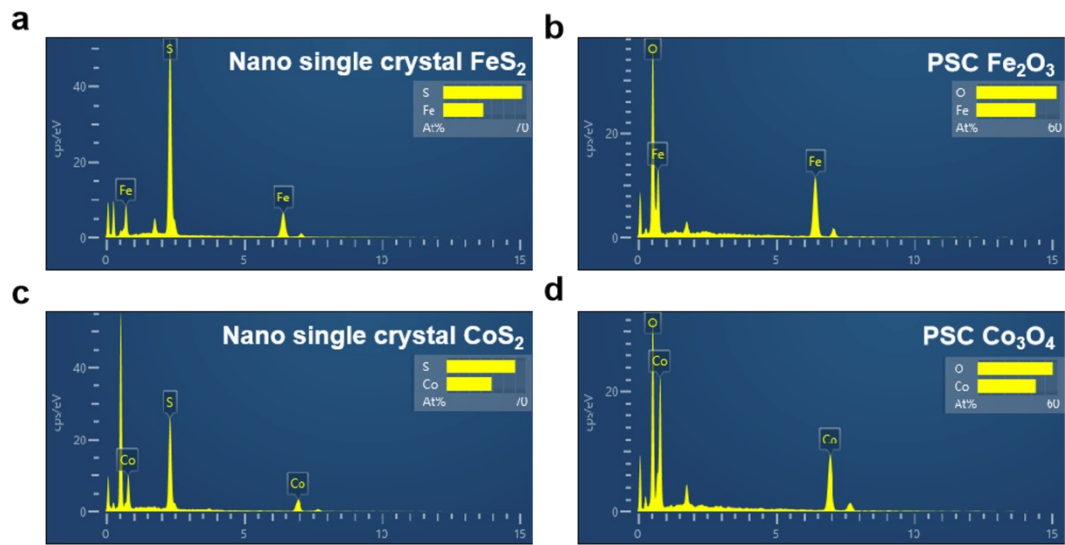

**Fig. S3** EDS images. (a) Precursor FeS<sub>2</sub> nano single crystal. (b) PSC Fe<sub>2</sub>O<sub>3</sub>. (c) Precursor CoS<sub>2</sub> nano single crystal. (d) PSC Co<sub>3</sub>O<sub>4</sub>.

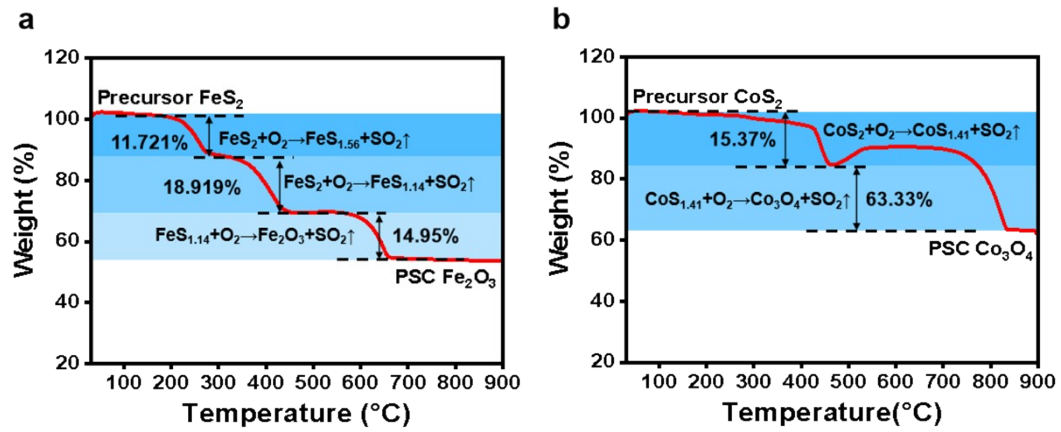

**Fig. S4** TGA curves under the air atmosphere. (a) From precursor  $\text{FeS}_2$  to PSC  $\text{Fe}_2\text{O}_3$ .  
 (b) From precursor  $\text{CoS}_2$  to PSC  $\text{Co}_3\text{O}_4$ .

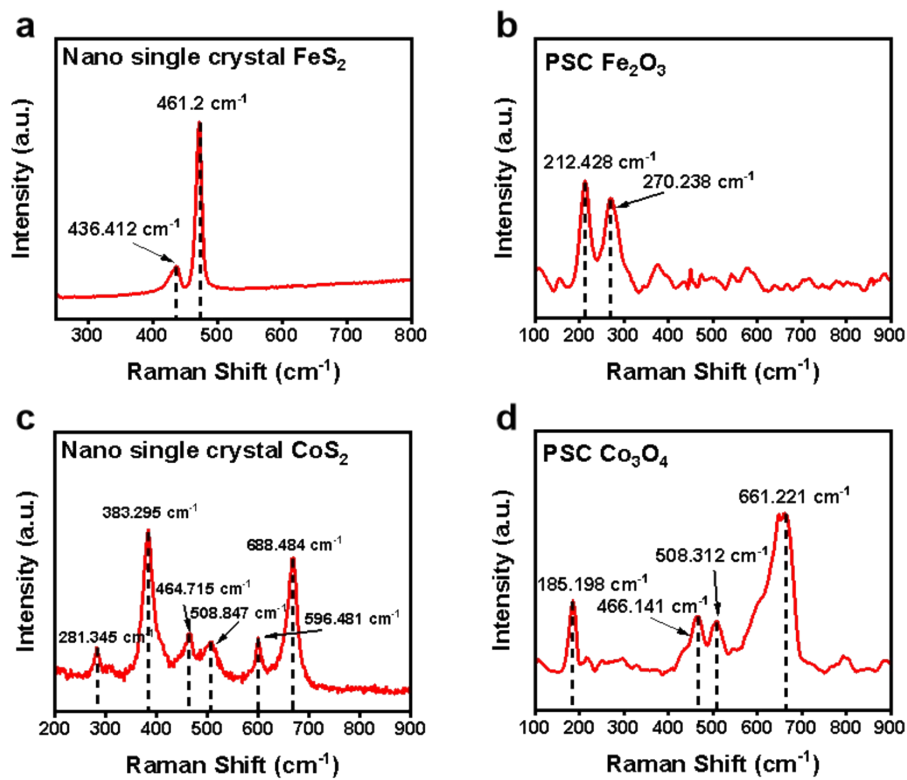

**Fig. S5** Raman spectras. (a)  $\text{FeS}_2$  nano single crystal. (b) PSC  $\text{Fe}_2\text{O}_3$ . (c)  $\text{CoS}_2$  nano single crystal. (d) PSC  $\text{Co}_3\text{O}_4$ .

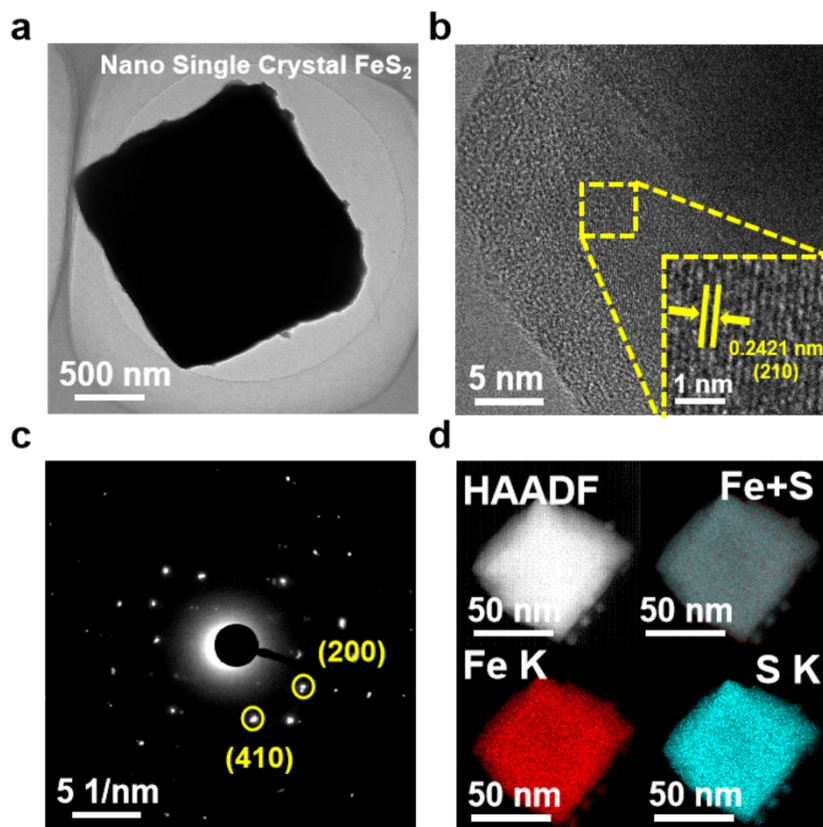

**Fig. S6** (a) FETEM image of precursor  $\text{FeS}_2$  nano single crystal. (b) HRTEM image of precursor  $\text{FeS}_2$  nano single crystal. (c) SAED pattern of precursor  $\text{FeS}_2$  nano single crystal. (d) EDS elemental mapping results of precursor  $\text{FeS}_2$  nano single crystal.

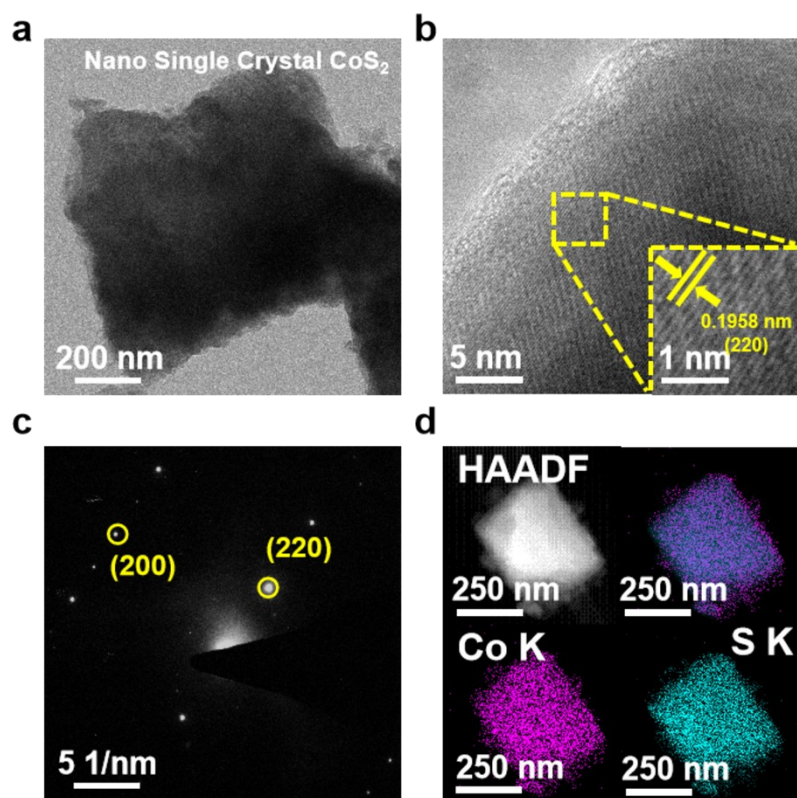

**Fig. S7** (a) FETEM image of precursor  $\text{CoS}_2$  nano single crystal. (b) HRTEM image of precursor  $\text{CoS}_2$  nano single crystal. (c) SAED pattern of precursor  $\text{CoS}_2$  nano single crystal. (d) EDS elemental mapping results of precursor  $\text{CoS}_2$  nano single crystal.



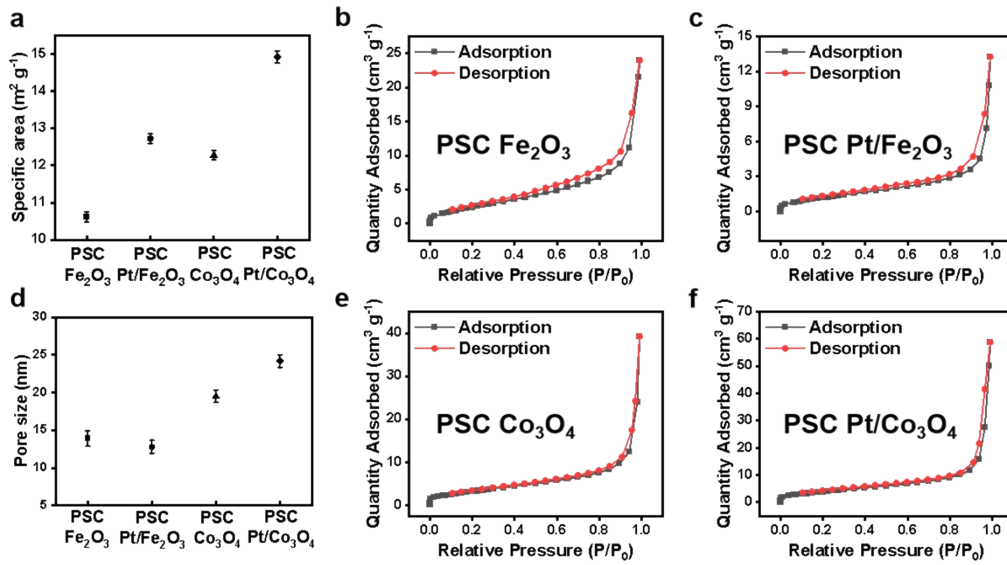

**Fig. S8** Specific area, pore size, and N<sub>2</sub> absorption-desorption isotherm of PSC Fe<sub>2</sub>O<sub>3</sub>, PSC Co<sub>3</sub>O<sub>4</sub>, Pt/Fe<sub>2</sub>O<sub>3</sub> and Pt/Co<sub>3</sub>O<sub>4</sub>. (a) Specific area. (b-c) N<sub>2</sub> absorption-desorption isotherm, (b) PSC Fe<sub>2</sub>O<sub>3</sub>, (c) PSC Pt/Co<sub>3</sub>O<sub>4</sub>. (d) Pore size. (e-f) N<sub>2</sub> absorption-desorption isotherm, (e) PSC Pt/Fe<sub>2</sub>O<sub>3</sub>, (f) PSC Co<sub>3</sub>O<sub>4</sub>.

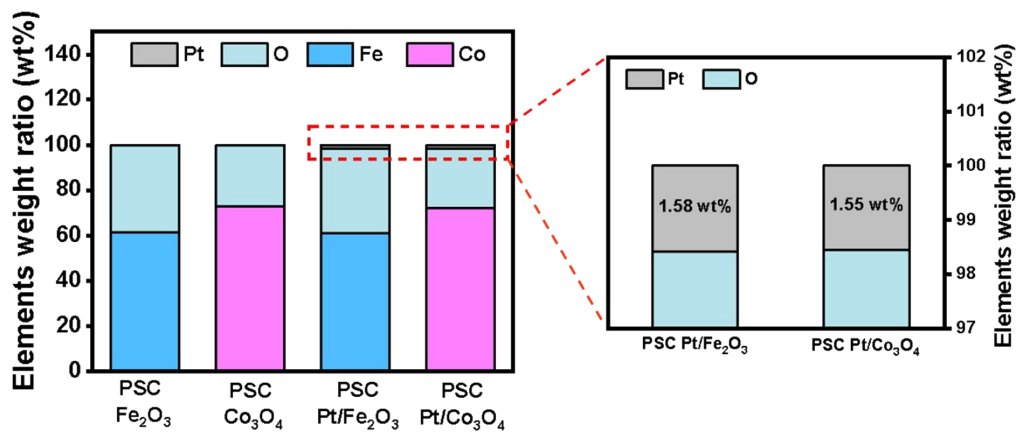

**Fig. S9** Weight content ratio of each element in PSC Fe<sub>2</sub>O<sub>3</sub>, PSC Co<sub>3</sub>O<sub>4</sub>, Pt/Fe<sub>2</sub>O<sub>3</sub> and Pt/Co<sub>3</sub>O<sub>4</sub>.

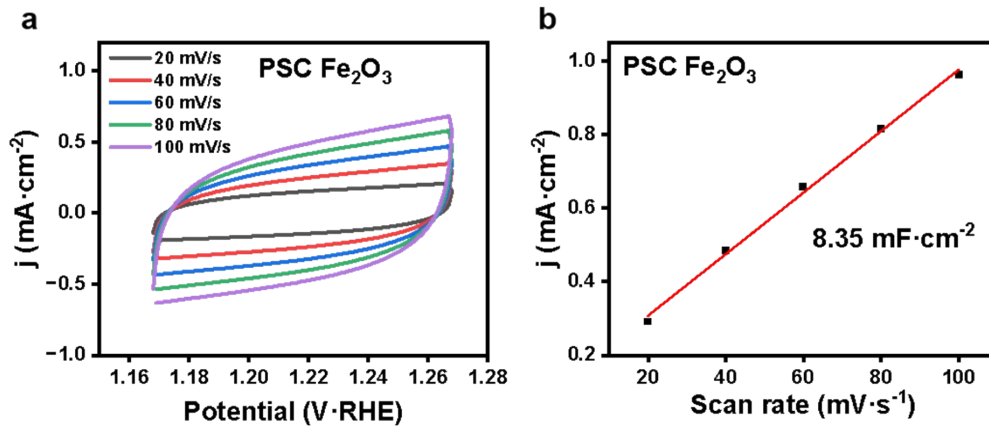

**Fig. S10** PSC Fe<sub>2</sub>O<sub>3</sub> of (a) CV curves. (b) Linear relationship between current density and scan rate.

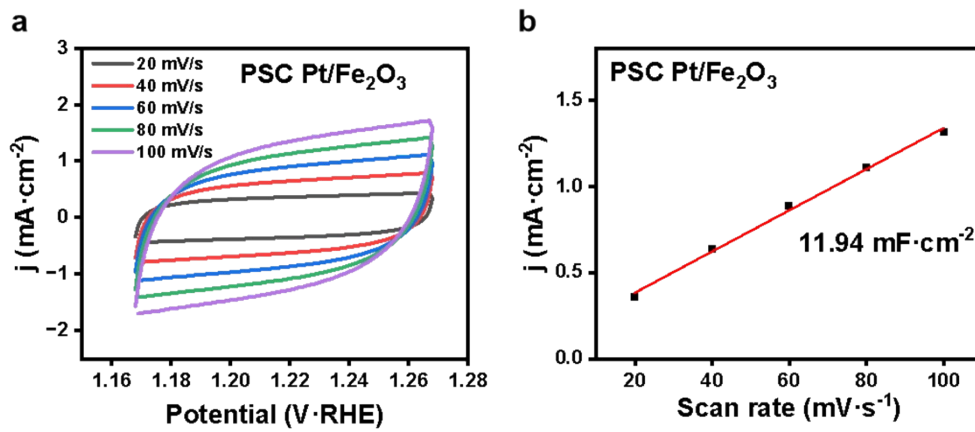

**Fig. S11** PSC Pt/Fe<sub>2</sub>O<sub>3</sub> of (a) CV curves. (b) Linear relationship between current density and scan rate.

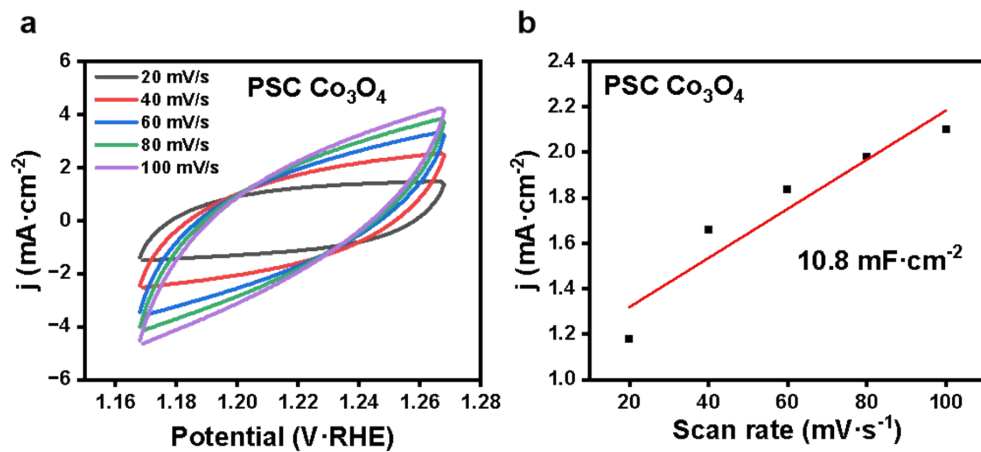

**Fig. S12** PSC Co<sub>3</sub>O<sub>4</sub> of (a) CV curves. (b) Linear relationship between current density and scan rate.

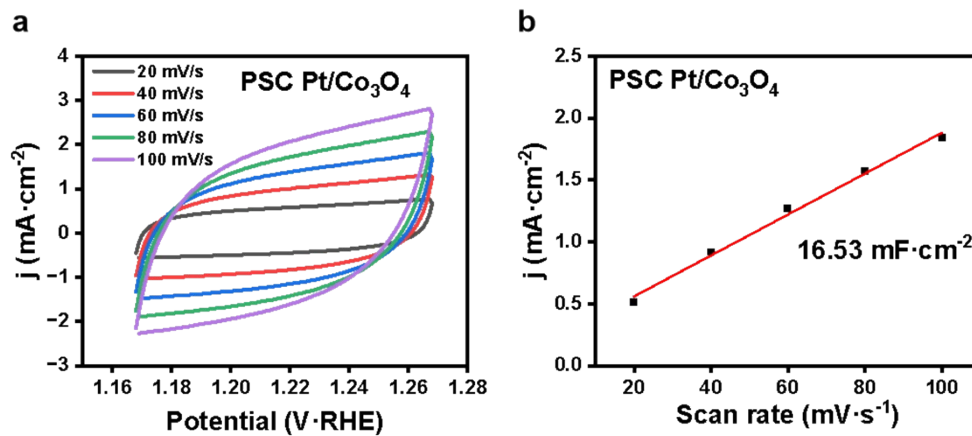

**Fig. S13** PSC Pt/Co<sub>3</sub>O<sub>4</sub> of (a) CV curves. (b) Linear relationship between current density and scan rate.

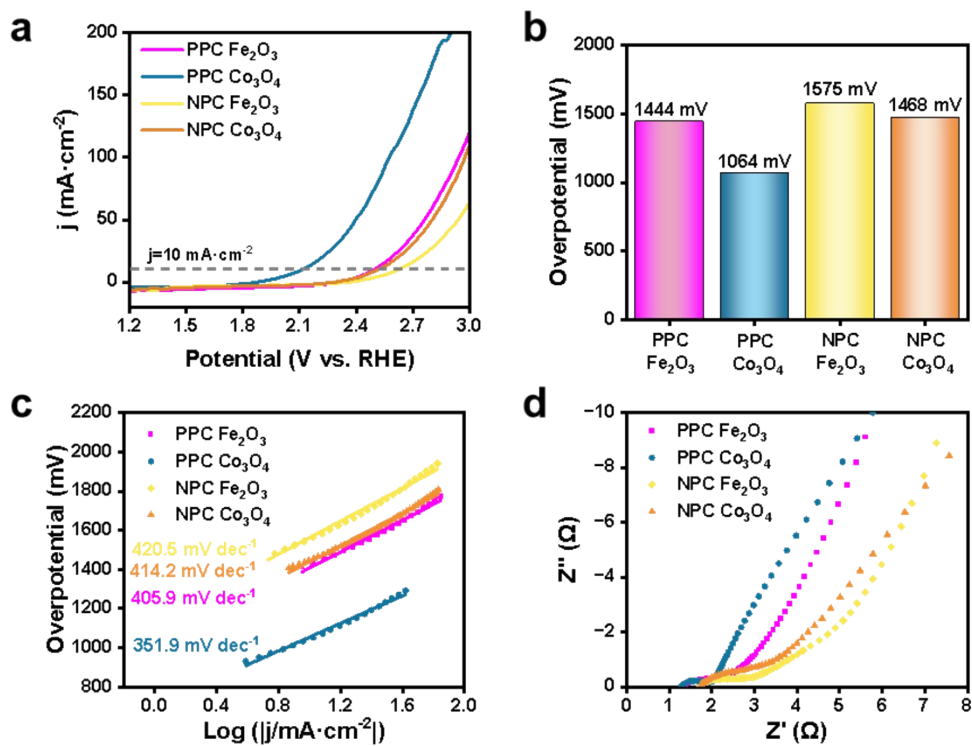

**Fig. S14** The OER electrocatalytic performance of PPC Fe<sub>2</sub>O<sub>3</sub>, NPC Fe<sub>2</sub>O<sub>3</sub>, PPC Co<sub>3</sub>O<sub>4</sub>, NPC Co<sub>3</sub>O<sub>4</sub> in 1M KOH solution. (a) LSV curves. (b) Overpotentials at 10 mA cm<sup>-2</sup>. (c) Tafel slopes. (d) EIS curves.

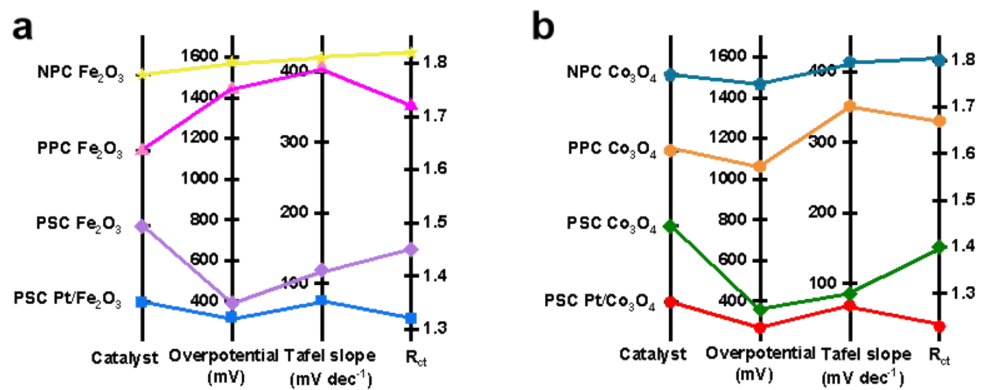

**Fig. S15** Comparisons of PSCs, PPC, NPC catalysts in overpotential, tafel slope and R<sub>ct</sub>.  
 (a) Fe<sub>2</sub>O<sub>3</sub> catalysts. (b) Co<sub>3</sub>O<sub>4</sub> catalysts.



**Table S1.** The Summary of the performance of different catalysts for OER.

| Catalysts                                                   | Electrolyte                      | $\eta$ (mV) at<br>$j=10$<br>$\text{mA}\cdot\text{cm}^{-2}$ | Tafel slope<br>( $\text{mV}\cdot\text{dec}^{-1}$ ) | Reference<br>s |
|-------------------------------------------------------------|----------------------------------|------------------------------------------------------------|----------------------------------------------------|----------------|
| $\text{Fe}_2\text{O}_3$ -(012)NCs                           | 1 M KOH                          | 317                                                        | 59                                                 | 1              |
| $\text{Fe}_2\text{O}_3$ @Mo                                 | 1 M KOH                          | 359                                                        | 80                                                 | 2              |
| $\text{NiFeO}_x$                                            | 1 M KOH                          | 380                                                        | /                                                  | 3              |
| $\text{Fe}_2\text{O}_3/\text{FeS}$                          | 1 M KOH                          | 320                                                        | 90                                                 | 4              |
| $\text{CoFe}_2\text{O}_4$                                   | 1 M KOH                          | 320                                                        | 71                                                 | 5              |
| $\text{Co}_3\text{O}_4$ @CoO SC                             | 0.5 M KOH                        | 430                                                        | 60                                                 | 6              |
| $\text{Co}_3\text{O}_4/\text{SnO}_2$                        | 1 M KOH                          | 487                                                        | 100                                                | 7              |
| C-Co/ $\text{Co}_3\text{O}_4$                               | 1 M KOH                          | 352                                                        | 80                                                 | 8              |
| Ce- $\text{Co}_3\text{O}_4$                                 | 0.5 M<br>$\text{H}_2\text{SO}_4$ | 345                                                        | 85.15                                              | 9              |
| PtFe/G-2h                                                   | 1 M KOH                          | 315                                                        | 56                                                 | 10             |
| O-MoS <sub>2</sub> @Pt                                      | 1 M KOH                          | 244                                                        | 53                                                 | 11             |
| Pt@Ti <sub>3</sub> C <sub>2</sub> T <sub>x</sub> -rGO 3 : 1 | 0.1 M<br>$\text{HClO}_4$         | 490                                                        | 165.3                                              | 12             |
| 1%Pt-substituted- $\text{Co}_3\text{O}_4$                   | 1 M KOH                          | 380                                                        | 117                                                | 13             |
| $\text{RuO}_2/(\text{Co},\text{Mn})_3\text{O}_4/\text{CC}$  | 0.5 M<br>$\text{H}_2\text{SO}_4$ | 270                                                        | 77                                                 | 14             |
| $\text{Fe}_2\text{O}_3$ sphere                              | 1 M KOH                          | 396                                                        | 128                                                | 2              |
| $\text{Co}_3\text{O}_4$ nano spheres                        | 1 M KOH                          | 407                                                        | 107                                                | 7              |
| PSC $\text{Fe}_2\text{O}_3$                                 | 1 M KOH                          | 391                                                        | 119                                                | This work      |
| PSC $\text{Co}_3\text{O}_4$                                 | 1 M KOH                          | 360                                                        | 86                                                 | This work      |
| PSC Pt/ $\text{Fe}_2\text{O}_3$                             | 1 M KOH                          | 319                                                        | 76                                                 | This work      |
| PSC Pt/ $\text{Co}_3\text{O}_4$                             | 1 M KOH                          | 269                                                        | 69                                                 | This work      |

## Reference

- 1 H. Wu, T. Yang, Y. Du, L. Shen and G. W. Ho, *Adv. Mater.*, 2018, **30**, 1804341.
- 2 A. Maurya and M. Yadav, *J. Alloy. Compd.*, 2023, **956**, 170208.
- 3 W. Moschkowitsch, N. Zion, H. C. Honig, N. Levy, D. A. Cullen and L. Elbaz, *ACS Catal.*, 2022, **12**, 12162-12169.
- 4 N. A. Khan, N. Rashid, I. Ahmad, Zahidullah, R. Zairov, H. u. Rehman, M. F. Nazar and U. Jabeen, *Int. J. Hydrog. Energy*, 2022, **47**, 22340-22347.
- 5 F. Waag, B. Gökce, C. Kalapu, G. Bendt, S. Salamon, J. Landers, U. Hagemann, M. Heidelmann, S. Schulz, H. Wende, N. Hartmann, M. Behrens and S. Barcikowski, *Sci Rep*, 2017, **7**, 13161.
- 6 C.-W. Tung, Y.-Y. Hsu, Y.-P. Shen, Y. Zheng, T.-S. Chan, H.-S. Sheu, Y.-C. Cheng and H. M. Chen, *Nat. Commun.*, 2015, **6**, 8106.
- 7 J. Milikić, S. Knežević, M. Ognjanović, D. Stanković, L. Rakočević and B. Šljukić, *Int. J. Hydrog. Energy*, 2023, **48**, 27568-27581.
- 8 L. Hang, Y. Sun, D. Men, S. Liu, Q. Zhao, W. Cai and Y. Li, *J. Mater. Chem. A*, 2017, **5**, 11163-11170.
- 9 J. Yang, F. Xu, W. Zhao, L. Liu and B. Weng, *Small*, 2024, **20**, 2309363.
- 10 H. Xiao, X. Yang, M. Zhao, R. Zhang, Y. Jing, L. Zhang, Y. He, H. Wu and J. Jia, *Int. J. Hydrog. Energy*, 2023, **48**, 38728-38741.
- 11 F. Gong, S. Ye, M. Liu, J. Zhang, L. Gong, G. Zeng, E. Meng, P. Su, K. Xie, Y. Zhang and J. Liu, *Nano Energy*, 2020, **78**, 105284.
- 12 L. Vazhayal, S. B. Alex and S. K. Haram, *J. Mater. Chem. A*, 2024, **12**, 27671-27685.
- 13 S. Nellaiappan, N. Jhariya, S. Irusta and A. Singhal, *Electrochim. Acta*, 2021, **365**, 137234.
- 14 S. Niu, X.-P. Kong, S. Li, Y. Zhang, J. Wu, W. Zhao and P. Xu, *Appl. Catal. B- Environ.*, 2021, **297**, 120442.
